# Supplementary material for: User-relevant factors determining prosthesis choice in persons with major unilateral upper limb defects: A meta-synthesis of qualitative literature and focus group results
Source: PubMed Central journal article supplement (PMC7326229; doi:10.1371/journal.pone.0234342), 2020-06-30
Supplement: pone.0234342.s001.pdf [file pone.0234342.s001.pdf]

**S1 Text. Search terms BeHEMoTH (Behavior of Interest, Health context, Exclusions, and Models or Theories) used to search PubMed.**

Below the used search string for PubMed is shown, this was adapted for use in the other bibliographic databases.

((Choice\* [tiab] OR chos\* [tiab] OR decision\* [tiab] OR decide [tiab] OR consider\* [tiab] OR select\* [tiab] OR pick\*[tiab]) AND (upper limb\* [tiab] OR hand\* [tiab] OR arm\* [tiab] OR forearm\* [tiab] OR transradial\* [tiab] OR transhumeral\* [tiab] OR forequar\* [tiab] OR wrist disarticul\* [tiab] OR elbow disarticul\* [tiab] OR shoulder disartricul\* [tiab]) AND prosthe\* [tiab])) AND (Home\* [tiab] OR daily lif\* [tiab] OR daily liv\* [tiab]) AND (Model\* [tiab] OR theor\* [tiab] OR framework\* [tiab] OR concept\* [tiab]) NOT (Non-theoretical model\* [tiab] OR technical model\* [tiab]OR statistical model\* [tiab] OR economic model\* [tiab])
