# Supplementary material for: User-relevant factors determining prosthesis choice in persons with major unilateral upper limb defects: A meta-synthesis of qualitative literature and focus group results
Source: PubMed Central journal article supplement (PMC7326229; doi:10.1371/journal.pone.0234342), 2020-06-30
Supplement: pone.0234342.s002.pdf [file pone.0234342.s002.pdf]

**S2 Text. Search terms SPIDER (Sample, Phenomenon of Interest, Design, Evaluation, Research type) used to search PubMed.**

Below the used search strings for PubMed are shown, these were adapted for use in the other bibliographic databases.

**Search 1:**

((upper limb prosthesis [tiab] OR hand prosthesis [tiab] OR arm prosthesis [tiab] OR forearm prosthesis [tiab] OR transradial prosthesis [tiab] OR transhumeral prosthesis [tiab] OR forequarter prosthesis [tiab] OR upper limb amputation [tiab] OR hand amputation [tiab] OR arm amputation [tiab] OR forearm amputation [tiab] OR transradial amputation [tiab] OR transhumeral amputation [tiab] OR forequarter amputation [tiab] OR wrist disarticulation [tiab] OR elbow disarticulation [tiab] OR shoulder disarticulation [tiab]) OR ("Artificial Limbs"[Mesh] AND (upper limb [tiab] OR hand [tiab] OR arm [tiab] OR forearm [tiab] OR transradial [tiab] OR transhumeral [tiab] OR forequarter [tiab] OR wrist disarticulation [tiab] OR elbow disarticulation [tiab] OR shoulder disarticulation [tiab]))) AND (focus group [tiab] OR questionnaire [tiab] OR survey [tiab] OR interview [tiab] OR opinion [tiab] OR experience [tiab] OR view [tiab] OR concern [tiab] OR motivation [tiab] OR value [tiab] OR desire [tiab] OR perspective [tiab] OR wish [tiab] OR expectation [tiab] OR attitude [tiab] OR feel [tiab] OR "Patient Satisfaction"[Mesh] OR useful [tiab] OR satisfaction [tiab] OR functional [tiab] OR usage [tiab] OR wear [tiab] OR advantage [tiab] OR disadvantage [tiab] OR embodiment [tiab] OR rejection rate [tiab] OR cosmetic [tiab] OR esthetic [tiab] OR utility [tiab] OR comfort [tiab] OR requirement [tiab] OR need [tiab] OR "Quality of Life"[Mesh] OR quality of life [tiab] OR "Cost-Benefit Analysis"[Mesh] OR Accept [tiab] OR reject [tiab] OR value based health care [tiab] OR effectiveness [tiab] OR efficiency [tiab] OR preference [tiab] OR economic [tiab] OR cost [tiab] OR OPUS [tiab] OR TAPES [tiab] OR QUEST [tiab] OR qualitative [tiab] OR narrative [tiab] OR mixed method [tiab] OR case study [tiab]) NOT (transplant [tiab] OR pediatric [tiab] OR 3D [tiab])

## Search 2:

(congenital [tiab] AND (upper limb\* [tiab] OR hand\* [tiab] OR arm\* [tiab] OR forearm\* [tiab] OR transradial\* [tiab] OR transhumeral\* [tiab] OR forequar\* [tiab] OR transversal reduct\* [tiab] OR wrist disarticul\* [tiab] OR elbow disarticul\* [tiab] OR shoulder disartricul\* [tiab]) AND (defic\* [tiab] OR defec\* [tiab] OR abnormal\* [tiab])) AND (focus group\* [tiab] OR questionnair\* [tiab] OR survey\* [tiab] OR interview\* [tiab] OR opinion\* [tiab] OR experien\* [tiab] OR view\* [tiab] OR concern\* [tiab] OR motivat\* [tiab] OR value\* [tiab] OR desir\* [tiab] OR perspectiv\* [tiab] OR wish\* [tiab] OR expectation\* [tiab] OR OR attitud\* [tiab] OR feel\* [tiab] OR "Patient Satisfaction"[Mesh] OR useful\* [tiab] OR satisf\* [tiab] OR functional\* [tiab] OR usage\* [tiab] OR wear\* [tiab] OR advantage\* [tiab] OR disadvantage\* [tiab] OR embodiment\* [tiab] OR rejection rate\* [tiab] OR cosmetic\* [tiab] OR esthetic\* [tiab] OR utilit\* [tiab] OR comfort\* [tiab] OR requirement\* [tiab] OR need\* [tiab] OR "Quality of Life"[Mesh] OR quality of life\* [tiab] OR "Cost-Benefit Analysis"[Mesh] OR Accept\* [tiab] OR reject\* [tiab] OR value based health care [tiab] OR effectiv\* [tiab] OR efficien\* [tiab] OR preference\* [tiab] OR econom\* [tiab] OR cost\* [tiab] OR OPUS\* [tiab] OR TAPES\* [tiab] OR QUEST\* [tiab] OR qualitativ\* [tiab] OR narrativ\* [tiab] OR mixed method\* [tiab] OR case stud\* [tiab]) NOT (transplant\* [tiab] OR pediatr\* [tiab] OR 3D\* [tiab])
