# Supplementary material for: User-relevant factors determining prosthesis choice in persons with major unilateral upper limb defects: A meta-synthesis of qualitative literature and focus group results
Source: PubMed Central journal article supplement (PMC7326229; doi:10.1371/journal.pone.0234342), 2020-06-30
Supplement: pone.0234342.s005.pdf [file pone.0234342.s005.pdf]

**S2 Table. List of all studies assessed for eligibility with full text screening.**

| Study                                                                                                                                                                                                                                                                                                                       | Included or excluded?                                              | Reason for exclusion (if applicable)                                                                                 |
|-----------------------------------------------------------------------------------------------------------------------------------------------------------------------------------------------------------------------------------------------------------------------------------------------------------------------------|--------------------------------------------------------------------|----------------------------------------------------------------------------------------------------------------------|
| Stephens-Fripp B, Jean Walker M, Goddard E, Alici G. A survey on what Australian’s with upper limb difference want in a prosthesis: justification for using soft robotics and additive manufacturing for customized prosthetic hands. <i>Disabil Rehabil Assist Technol.</i> 2019;0: 1–8. doi:10.1080/17483107.2019.1580777 | Excluded.                                                          | Non-qualitative study.                                                                                               |
| Zheng JY, Kalpakjian C, Larraga-Martinez M, Chestek CA, Gates DH. Priorities for the design and control of upper limb prostheses: A focus group study. <i>Disabil Health J.</i> 2019; doi:10.1016/j.dhjo.2019.03.009                                                                                                        | Included, except text about ‘invasive prosthetic interfaces’.      | ‘Invasive cortical interfaces’ are not commercial available and therefore text about these interfaces were excluded. |
| Janssen EM, Benz HL, Tsai J-H, Bridges JF. Identifying and prioritizing concerns associated with prosthetic devices for use in a benefit-risk assessment: a mixed-methods approach. <i>Expert Rev Med Devices.</i> 2018;15: 385–398. doi:10.1080/17434440.2018.1470505                                                      | Excluded.                                                          | Study is about osseointegration, which is not commercially available yet.                                            |
| Widehammar C, Pettersson I, Janeslatt G, Hermansson L. The influence of environment: Experiences of users of myoelectric arm prosthesis—a qualitative study. <i>Prosthet Orthot Int.</i> 2018;42: 28–36. doi:10.1177/0309364617704801                                                                                       | Included.                                                          |                                                                                                                      |
| Schweitzer W, Thali MJ, Egger D. Case-study of a user-driven prosthetic arm design: Bionic hand versus customized body-powered technology in a highly demanding work environment. <i>J NeuroEngineering Rehabil.</i> 2018;15. doi:10.1186/s12984-017-0340-0                                                                 | Included qualitative parts of study.                               | Excluded non-qualitative parts of study.                                                                             |
| Resnik L, Klinger S, Gill A, Ekerholm Biester S. Feminine identity and functional benefits are key factors in women’s decision making about upper limb prostheses: a case series. <i>Disabil Rehabil Assist Technol.</i> 2018; 1–15. doi:10.1080/17483107.2018.1467973                                                      | Included.                                                          |                                                                                                                      |
| Resnik L, Acluche F, Lieberman Klinger S, Borgia M. Does the DEKA Arm substitute for or supplement conventional prostheses. <i>Prosthet Orthot Int.</i> 2018;42: 534–543. doi:10.1177/0309364617729924                                                                                                                      | Excluded.                                                          | Non-qualitative study.                                                                                               |
| Davis C, St. Onge M. Myoelectric and Body-Powered Upper-Limb Prostheses: The Users’ Perspective. <i>J Prosthetics Orthot.</i> 2018; P30–P34. doi:10.1097/JPO.000000000000155                                                                                                                                                | Included part about participant with unilateral upper limb defect. | Excluded part about participant with bilateral upper limb defects.                                                   |
| Lankhorst IMF, Baars ECT, van Wijk I, Janssen WGM, Poelma MJ, van der Sluis CK.                                                                                                                                                                                                                                             | Excluded.                                                          | Age participants < 18 years.                                                                                         |

|                                                                                                                                                                                                                                                                                                          |                                                                                         |                                                                                   |
|----------------------------------------------------------------------------------------------------------------------------------------------------------------------------------------------------------------------------------------------------------------------------------------------------------|-----------------------------------------------------------------------------------------|-----------------------------------------------------------------------------------|
| Living with transversal upper limb reduction deficiency: limitations experienced by young adults during their transition to adulthood. <i>Disabil Rehabil.</i> 2017;39: 1623–1630. doi:10.1080/09638288.2016.1206632                                                                                     |                                                                                         |                                                                                   |
| Resnik LJ, Borgia ML, Acluche F. Perceptions of satisfaction, usability and desirability of the DEKA Arm before and after a trial of home use. <i>PLoS One.</i> 2017;12. doi:10.1371/journal.pone.0178640                                                                                                | Excluded.                                                                               | Non-qualitative study.                                                            |
| Benz HL, Yao J, Rose L, Olgac O, Kreutz K, Saha A, et al. Upper Extremity Prosthesis User Perspectives on Unmet Needs and Innovative Technology. <i>Conf Proc IEEE Eng Med Biol Soc.</i> 2016;25: 289–313. doi:10.1007/s11065-015-9294-9.Functional                                                      | Included.                                                                               |                                                                                   |
| Nagaraja VH, Bergmann JHM, Sen D, Thompson MS. Examining the needs of affordable upper limb prosthetic users in India: A questionnairebased survey. <i>Technol Disabil.</i> 2016;28: 101–110. doi:10.3233/TAD-160448                                                                                     | Included part about open-ended questions of survey.                                     | Excluded parts with closed questions of survey.                                   |
| Deijs M, Bongers RM, Ringeling-Van Leusen NDM, Van Der Sluis CK. Flexible and static wrist units in upper limb prosthesis users: Functionality scores, user satisfaction and compensatory movements. <i>J Neuroeng Rehabil.</i> 2016;13. doi:10.1186/s12984-016-0130-0                                   | Included qualitative parts of study.                                                    | Excluded non-qualitative parts of study.                                          |
| Whelan L, Wagner N. Analysis of Factors Influencing Outcomes of Full and Partial Hand Multi-articulating Prostheses. <i>J Hand Ther.</i> 2016;29: 363. doi:10.1016/j.jht.2014.08.015                                                                                                                     | Excluded.                                                                               | No full text retrievable.                                                         |
| Luchetti M, Cutti AG, Verni G, Sacchetti R, Rossi N. Impact of Michelangelo prosthetic hand: Findings from a crossover longitudinal study. <i>J Rehabil Res Dev.</i> 2015;52: 605–618. doi:10.1682/JRRD.2014.11.0283                                                                                     | Included qualitative parts of study.                                                    | Excluded non-qualitative parts of study.                                          |
| Wijk U, Carlsson I. Forearm amputees' views of prosthesis use and sensory feedback. <i>J Hand Ther.</i> 2015;28: 269–278. doi:10.1016/j.jht.2015.01.013                                                                                                                                                  | Included.                                                                               |                                                                                   |
| Abd Razak NA, Abu Osman NA, Kamyab M, Wan Abas WAB, Gholizadeh H. Satisfaction and problems experienced with wrist movements: comparison between a common body-powered prosthesis and a new biomechatronics prosthesis. <i>Am J Phys Med Rehabil.</i> 2014;93: 437–444. doi:10.1097/PHM.0b013e3182a51fc2 | Excluded.                                                                               | Non-qualitative study.                                                            |
| Resnik L, Latlief G, Klinger SL, Sasson N, Walters LS. Do users want to receive a DEKA Arm and why? Overall findings from the Veterans Affairs Study to optimize the DEKA Arm. <i>Prosthet Orthot Int.</i> 2014;38: 456–466. doi:10.1177/0309364613506914                                                | Included parts about home use, in which DEKA-arm is compared with their current device. | Excluded parts of the study that were non-qualitative or were not about home use. |

|                                                                                                                                                                                                                                                                                                                            |                                                               |                                                                                                                                                             |
|----------------------------------------------------------------------------------------------------------------------------------------------------------------------------------------------------------------------------------------------------------------------------------------------------------------------------|---------------------------------------------------------------|-------------------------------------------------------------------------------------------------------------------------------------------------------------|
| Van der Horst H, Hoogsteyns M. Disability, family and technical aids: A study of how disabling/enabling experiences come about in hybrid family relations. <i>Disabil Soc.</i> 2014;29: 821–833. doi:10.1080/09687599.2013.844102                                                                                          | Included parts about adult upper limb prosthesis users.       | Excluded parts about experiences with prosthesis as a child (<18 years) and all parts that did not describe the experiences of upper limb prosthesis users. |
| Lewis S, Russold MF, Dietl H, Kaniusas E. Satisfaction of Prosthesis Users with Electrical Hand Prostheses and their Suggested Improvements. <i>Biomed Tech (Berl)</i> . 2013;58 Suppl 1. doi:10.1515/bmt-2013-4385                                                                                                        | Excluded.                                                     | Non-qualitative study.                                                                                                                                      |
| Vasluian E, de Jong IGM, Janssen WGM, Poelma MJ, van Wijk I, Reinders-Messelink HA, et al. Opinions of Youngsters with Congenital Below-Elbow Deficiency, and Those of Their Parents and Professionals Concerning Prosthetic Use and Rehabilitation Treatment. <i>PLoS One</i> . 2013;8. doi:10.1371/journal.pone.0067101  | Included parts about late adolescents.                        | Excluded parts about participants early adolescents, children and healthcare professionals.                                                                 |
| Waldera KE, Heckathorne CW, Parker M, Fatone S. Assessing the prosthetic needs of farmers and ranchers with amputations. <i>Disabil Rehabil Assist Technol</i> . 2013;8: 204–212. doi:10.3109/17483107.2012.699994                                                                                                         | Included parts about upper-limb prosthesis users.             | Excluded parts about lower limb prosthesis-users.                                                                                                           |
| Bouffard J, Vincent C, Boulianne E, Lajoie S, Mercier C. Interactions Between the Phantom Limb Sensations, Prosthesis Use, and Rehabilitation as Seen by Amputees and Health Professionals. <i>J Prosthetics Orthot</i> . 2012;24:25-33. doi: 10.1097/JPO.0b013e318240d171                                                 | Included qualitative parts about upper-limb prosthesis users. | Excluded non-qualitative parts and parts about health care professionals.                                                                                   |
| Østlie K, Lesjø IM, Franklin RJ, Garfelt B, Skjeldal OH, Magnus P. Prosthesis use in adult acquired major upper-limb amputees: Patterns of wear, prosthetic skills and the actual use of prostheses in activities of daily life. <i>Disabil Rehabil Assist Technol</i> . 2012;7: 479–493. doi:10.3109/17483107.2011.653296 | Excluded.                                                     | Non-qualitative study.                                                                                                                                      |
| Kyberd PJ, Hill W. Survey of upper limb prosthesis users in Sweden, the United Kingdom and Canada. <i>Prosthet Orthot Int</i> . 2011;35: 234–241. doi:10.1177/0309364611409099                                                                                                                                             | Excluded.                                                     | No results of open-ended questions presented, so no qualitative content.                                                                                    |
| Berke GM, Ferguson J, Milani JR, Hattingh J, McDowell M, Nguyen V, et al. Comparison of satisfaction with current prosthetic care in veterans and servicemembers from vietnam and OIF/OEF conflicts with major traumatic limb loss. <i>J Rehabil Res Dev</i> . 2010;47: 361–372. doi:10.1682/JRRD.2009.12.0193             | Excluded.                                                     | Non-qualitative study.                                                                                                                                      |
| Reiber GE, McFarland L V., Hubbard S, Maynard C, Blough DK, Gambel JM, et al. Servicemembers and veterans with major traumatic limb loss from vietnam war                                                                                                                                                                  | Excluded.                                                     | Non-qualitative study.                                                                                                                                      |

|                                                                                                                                                                                                                                                                                    |                                                                                                                     |                                                                                        |
|------------------------------------------------------------------------------------------------------------------------------------------------------------------------------------------------------------------------------------------------------------------------------------|---------------------------------------------------------------------------------------------------------------------|----------------------------------------------------------------------------------------|
| and OIF/OEF conflicts: Survey methods, participants, and summary findings. J Rehabil Res Dev. 2010;47: 275–297. doi:10.1682/JRRD.2010.01.0009                                                                                                                                      |                                                                                                                     |                                                                                        |
| Murray CD. Being like everybody else: The personal meanings of being a prosthesis user. Disabil Rehabil. 2009; doi:10.1080/09638280802240290                                                                                                                                       | Excluded.                                                                                                           | Target population could not be distinguished from other participants.                  |
| Schaffalitzky E, NiMhurchadha S, Gallagher P, Hofkamp S, MacLachlan M, Wegener ST, et al. Identifying the values and preferences of prosthetic users: A case study series using the repertory grid technique. Prosthet Orthot Int. 2009;33: 157–166. doi:10.1080/03093640902855571 | Included parts about upper limb prosthesis users (case 3 & 4).                                                      | Excluded parts about lower limb prosthesis users (case 1 & 2).                         |
| Saradjian A, Thompson AR, Datta D. The experience of men using an upper limb prosthesis following amputation: Positive coping and minimizing feeling different. Disabil Rehabil. 2008;30: 871–883. doi:10.1080/09638280701427386                                                   | Included.                                                                                                           |                                                                                        |
| Biddiss E, Chau T. Upper-limb prosthetics: critical factors in device abandonment. Am J Phys Med Rehabil. 2007;86: 977–987. doi:10.1097/PHM.0b013e3181587f6c                                                                                                                       | Excluded.                                                                                                           | Non-qualitative study.                                                                 |
| Kyberd PJ, Wartenberg C, Sandsjö L, Jönsson S, Gow D, Frid J, et al. Survey of Upper-Extremity Prosthesis Users in Sweden and the United Kingdom. Am Acad Orthotists Prosthetists. 2007;19: 34–54. doi:10.4324/9780203001790                                                       | Included part about open-ended questions of survey.                                                                 | Excluded parts with closed questions of survey.                                        |
| Biddiss E, Beaton D, Chau T. Consumer design priorities for upper limb prosthetics. Disabil Rehabil Assist Technol. 2007;2: 346–357. doi:10.1080/17483100701714733                                                                                                                 | Included parts about open-ended questions of survey and adult participants (as far as this could be distinguished). | Excluded parts about closed questions of survey and parts about paediatric population. |
| Pylatiuk C, Schulz S, Doderlein L. Results of an internet survey of myoelectric prosthetic hand users. Prosthet Orthot Int. 2007;31: 362–370. doi:10.1080/03093640601061265                                                                                                        | Excluded.                                                                                                           | Non-qualitative study.                                                                 |
